# Supplementary material
Source: MDPI journal article supplement (https://www.mdpi.com/2411-5142/8/1/21)
Supplement: s1 [file s1]

Supplementary figures

FULL COURSE OVERVIEW

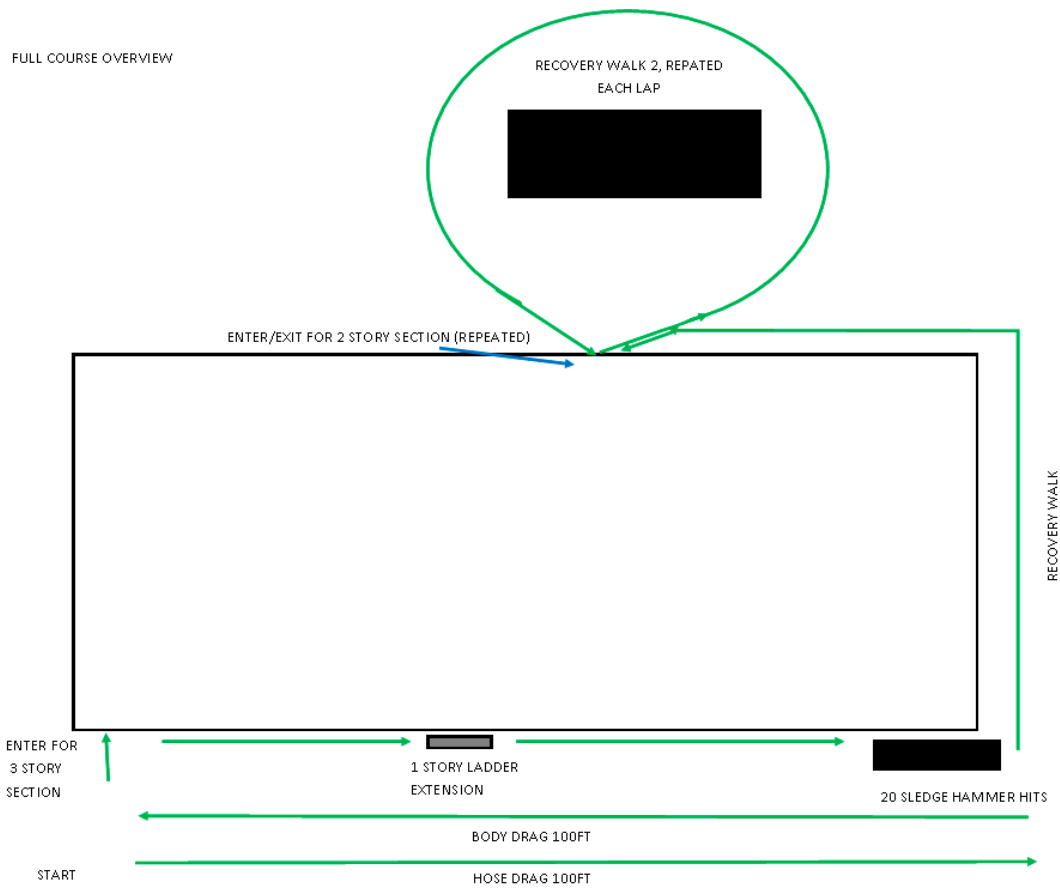

Figure S1: SF1 Air Management Course Schematic, Full Course Overview

## SECOND FLOOR OVERVIEW

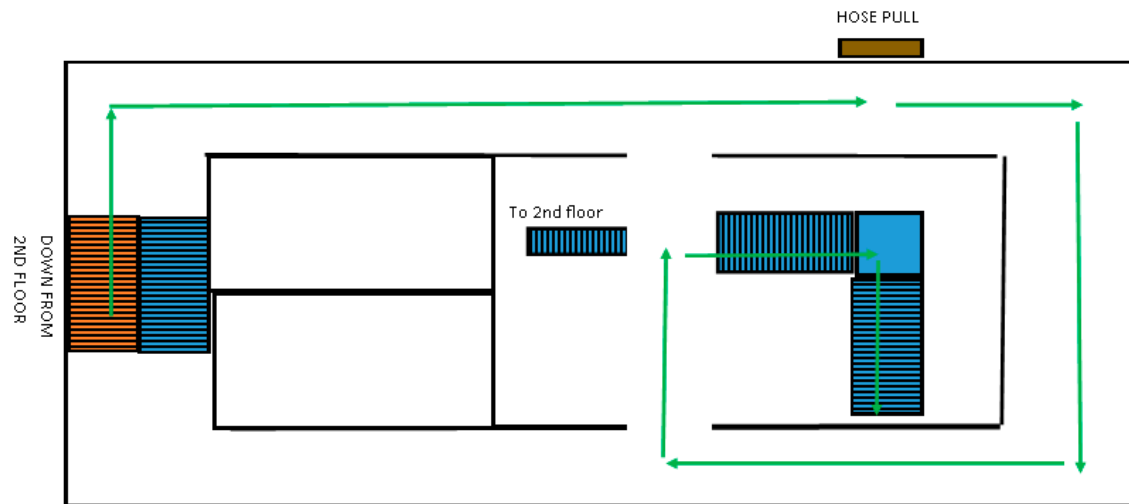

Figure S2: SF2 Air Management Course Schematic, Second Floor Overview

## THIRD FLOOR OVERVIEW

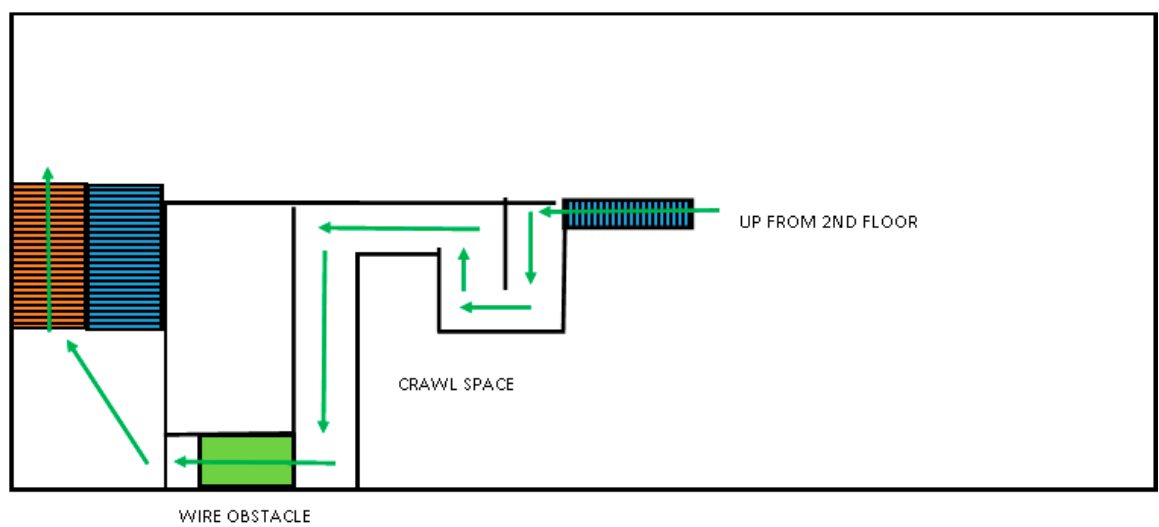

Figure S3: SF3 Air Management Course Schematic, Third Floor Overview

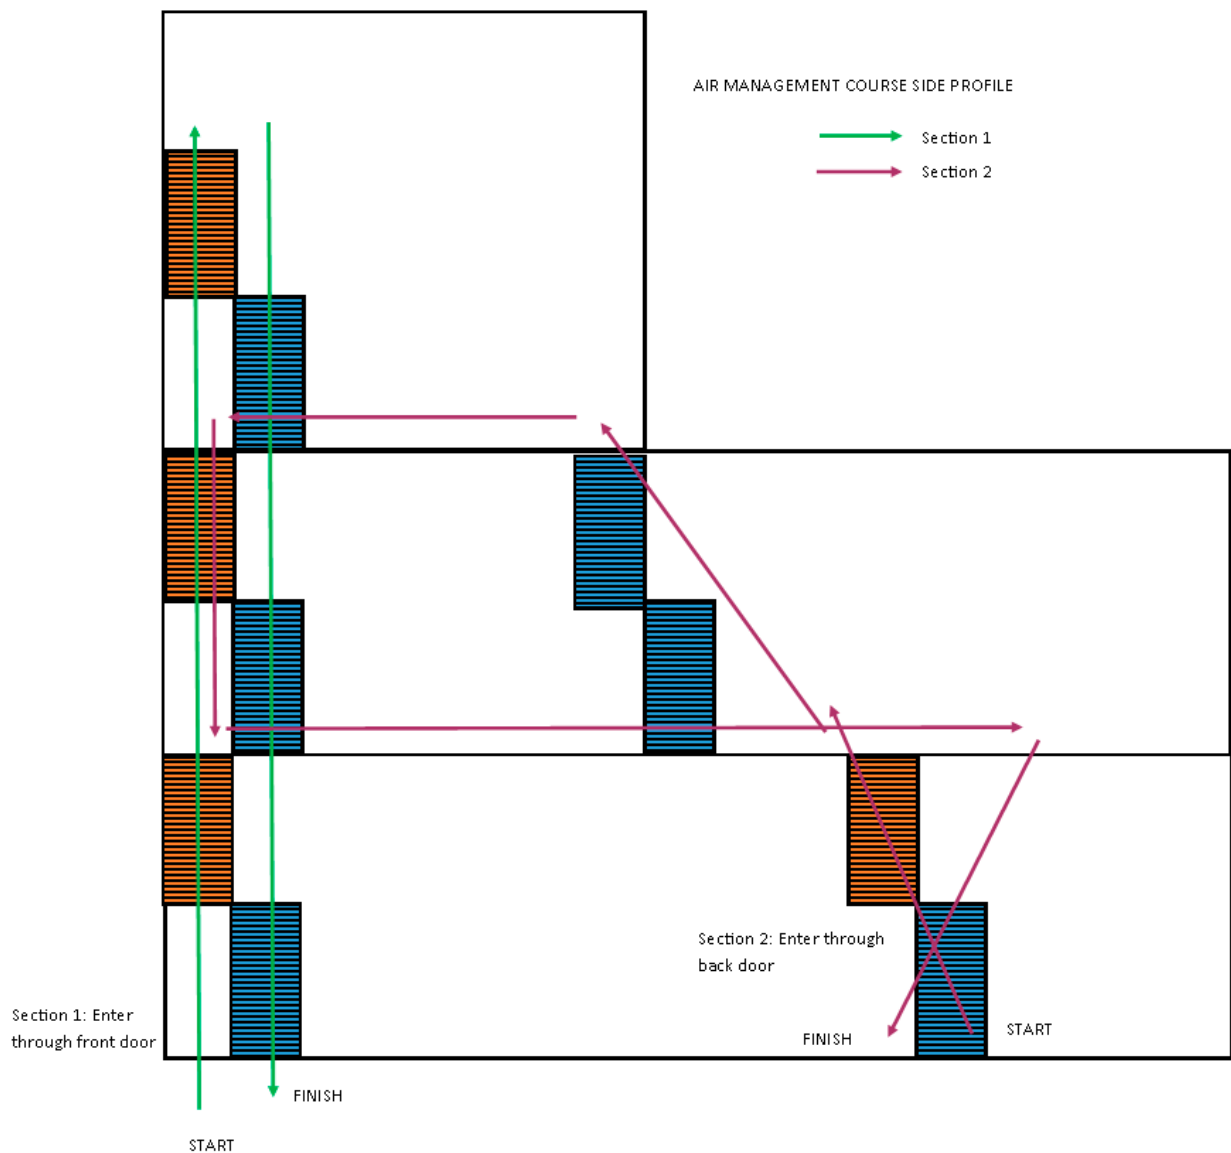

Figure S4: SF4 Air Management Course Schematic, Side Profile View

### Description

These figures represent the layout and direction of movement for the air management course.
